# Supplementary material for: Complexity and developmental changes in the expression pattern of claudins at the blood–CSF barrier
Source: PubMed Central journal article supplement (PMC3483103; doi:10.1007/s00418-012-1001-9), 2012-08-11
Supplement: 418_2012_1001_MOESM2_ESM.pdf [file 418_2012_1001_MOESM2_ESM.pdf]

## Complexity and developmental changes in the expression pattern of claudins at the blood-CSF barrier

### Histochemistry and Cell Biology

I Kratzer, A Vasiljevic, C Rey, M Fevre-Montange, N Saunders, N Strazielle, JF Gherzi-Egea  
Inserm U1028, Lyon Neuroscience Research Center, Neurooncology & Neuroinflammation Team, Lyon-1  
University, F-69000, France.

E-mail: jean-francois.ghersi-egea@inserm.fr

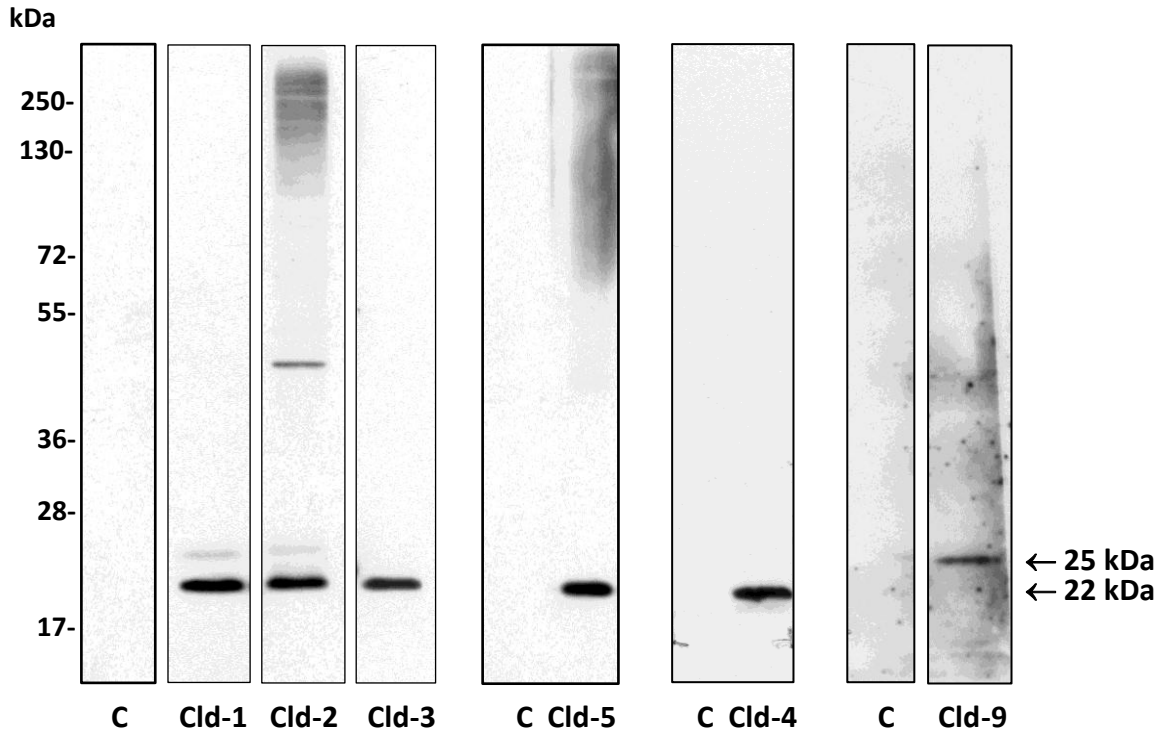

### ESM\_2 Western blot analysis of Antibody specificity

Full length electrophoretic profile are shown for homogenates of lateral ventricle choroid plexuses (10  $\mu$ g) used to test the polyclonal rabbit anti-Cld-1, Cld-2, Cld-3, and Cld-9 Ab, of brain microvessel preparations (5  $\mu$ g) used to test the monoclonal anti-Cld-5 Ab, and of MDCK (10  $\mu$ g) to test the polyclonal anti-Cld-4 Ab. The specificity of the Ab was confirmed by the detection of a strong band around 25 kDa for Cld-9 and 22 kDa for the other Clds. In addition, Cld-2 Ab revealed a second band at 45 kDa, which may result from dimer formation. C: control obtained in identical ECL conditions by omitting the primary antibody
